# Supplementary material for: Climate envelope predictions indicate an enlarged suitable wintering distribution for Great Bustards (Otis tarda dybowskii) in China for the 21st century
Source: PeerJ. 2016 Feb 1;4:e1630. doi: 10.7717/peerj.1630 (PMC4741084; doi:10.7717/peerj.1630)
Supplement: Supplemental Information 1 — Supplement S1 presence data. [file peerj-04-1630-s001.xlsx]

## Sheet: Appendix 1
Num	quantity	X	Y	Time	Source
1		117.198	30.4438	1992-1993，1998-2002	蒋劲松 2003,中国大鸭资源现状及其保护的研究；吴月龙等 2001大鸨越冬种群调查与保护对策；Wang Qishan in litt. 1997；Lu Jianjian 1990；红皮书
2	4	116.84	30.5025	1999	吴月龙等 2001,大鸨越冬种群调查与保护对策
3	1	117.766	33.0816	1999	吴月龙等 2001,大鸨越冬种群调查与保护对策
4	1	117.609	32.9679	1996	吴月龙等 2001,大鸨越冬种群调查与保护对策
5	20	116.439	32.481	1998	蒋劲松 2003,中国大鸭资源现状及其保护的研究
6	15	116.292	32.4457	1998	蒋劲松 2003,中国大鸭资源现状及其保护的研究
7	4，9+2	117.553	32.9022	1997-2000	吴月龙等 2001,大鸨越冬种群调查与保护对策
8	3	115.602	32.4375	1999	吴月龙等 2001,大鸨越冬种群调查与保护对策
9	5	117.869	33.0856	1998	吴月龙等 2001,大鸨越冬种群调查与保护对策
10	6+	115.96	33.7204	1998	吴月龙等 2001,大鸨越冬种群调查与保护对策
11	4	117.162	32.8859	2000	吴月龙等 2001,大鸨越冬种群调查与保护对策
12	1	116.509	32.9229	1999	吴月龙等 2001,大鸨越冬种群调查与保护对策
13	15,5	116.713	32.5575	19981999	吴月龙等 2001,大鸨越冬种群调查与保护对策
14	100，200,20	117.088	30.3623	1989，1992-1993，1998-2002	蒋劲松 2003,中国大鸭资源现状及其保护的研究；吴月龙等 2001,大鸨越冬种群调查与保护对策；Wang Qishan in litt. 1997；Lu Jianjian 1990；红皮书
15	4+	116.984	40.5333	2011-2013	http://blog.sina.com.cn/s/blog_5937924b0100qeww.html
16	1-2,6-8	115.931	40.4446	1990-2000	Zhao Xinru per M.Rank in litt. 2000；红皮书
17	1	104.515	35.4214	2013	http://www.gs.chinanews.com/news/2013/01-17/205331.shtml
18	10+，37	115.955	38.9405	2005-2011,2012	武明录等 2011， 河北省大鸨的分布与保护
19		115.655	39.2154	2005-2011	武明录等 2011， 河北省大鸨的分布与保护
20		115.854	38.7345	2005-2011	武明录等 2011， 河北省大鸨的分布与保护
21		115.27	39.0468	2005-2011	武明录等 2011， 河北省大鸨的分布与保护
22		115.502	39.0085	2005-2011	武明录等 2011， 河北省大鸨的分布与保护
23		116.637	38.1883	2002-2009	孟德荣2010,河北沧州地区大鸨救助研究
24		117.026	38.4181	2002-2009	孟德荣2010,河北沧州地区大鸨救助研究
25		116.612	37.7978	2002-2009	孟德荣2010,河北沧州地区大鸨救助研究
26	100+	117.596	38.1778	2005-2011	武明录等 2011， 河北省大鸨的分布与保护
27		116.351	38.3826	2002-2009	孟德荣2010,河北沧州地区大鸨救助研究
28	100+	117.176	38.4471	2005-2011，2002-2009	武明录等 2011， 河北省大鸨的分布与保护，孟德荣2010河北沧州地区大鸨救助研究
29		117.243	38.1562	2002-2009	孟德荣2010河北沧州地区大鸨救助研究
30	1	116.82	38.0965	2011	http://yzdsb.hebnews.cn/2011/0329/c_78.htm；http://www.he.xinhuanet.com/sannong/2011-03/02/content_22179513.htm
31		116.933	38.5159	2002-2009	孟德荣2010,河北沧州地区大鸨救助研究
32		116.65	37.7295	2002-2009	孟德荣2010,河北沧州地区大鸨救助研究
33		116.012	38.2339	2002-2009	孟德荣2010,河北沧州地区大鸨救助研究
34		117.336	38.0778	2002-2009	孟德荣2010,河北沧州地区大鸨救助研究
35		117.765	41.9207	2005-2011	武明录等 2011， 河北省大鸨的分布与保护
36		116.974	42.1493	2005-2011	武明录等 2011， 河北省大鸨的分布与保护
37		115.239	36.528	2005-2011	武明录等 2011， 河北省大鸨的分布与保护
38		115.525	38.2674	2005-2011	武明录等 2011， 河北省大鸨的分布与保护
39		115.651	37.6476	2005-2011	武明录等 2011， 河北省大鸨的分布与保护
40		116.552	38.8702	2005-2011	武明录等 2011， 河北省大鸨的分布与保护
41	10+	119.464	39.8567	2005-2011	武明录等 2011， 河北省大鸨的分布与保护
42	5	114.833	37.6272	1999-2002	蒋劲松 2003,中国大鸭资源现状及其保护的研究
43	10+	113.986	38.2698	2005-2011	武明录等 2011， 河北省大鸨的分布与保护
44	10+	119.238	39.4208	2005-2011	武明录等 2011， 河北省大鸨的分布与保护
45	10+	118.489	39.2406	2005-2011	武明录等 2011， 河北省大鸨的分布与保护
46		114.792	37.3921	2005-2011	武明录等 2011， 河北省大鸨的分布与保护
47	1	114.304	36.8793	2012	http://www.chinanews.com/sh/2012/12-12/4403446.shtml
48		115.64	40.3274	2005-2011	武明录等 2011， 河北省大鸨的分布与保护
49		114.806	39.9664	2005-2011	武明录等 2011， 河北省大鸨的分布与保护
50	130	114.178	34.9061	2010	韩耀建 2011黄河湿地豫东段大鸨（东方亚种）越冬集群和栖息地生境特征研究
51	20+	112.653	34.8361	1995-2007	马朝红大鸨在孟津越冬动态调查
52	52	112.775	34.8156	1995-2007	马朝红大鸨在孟津越冬动态调查，蒋劲松 2003中国大鸭资源现状及其保护的研究
53		112.8	34.8151	1995-2007	马朝红大鸨在孟津越冬动态调查
54		114.78	34.922	2009-2011	韩耀建 2011,黄河湿地豫东段大鸨（东方亚种）越冬集群和栖息地生境特征研究
55		114.308	34.8857	2009-2011	韩耀建 2011,黄河湿地豫东段大鸨（东方亚种）越冬集群和栖息地生境特征研究
56		114.319	34.9539	2009-2011	韩耀建 2011,黄河湿地豫东段大鸨（东方亚种）越冬集群和栖息地生境特征研究
57		114.422	34.9383	2009-2011	韩耀建 2011,黄河湿地豫东段大鸨（东方亚种）越冬集群和栖息地生境特征研究
58	2,4	114.366	34.8611	20092010	韩耀建 2011,黄河湿地豫东段大鸨（东方亚种）越冬集群和栖息地生境特征研究
59	300	111.146	34.7965	2011	韩耀建 2011,黄河湿地豫东段大鸨（东方亚种）越冬集群和栖息地生境特征研究
60	42	114.079	34.8668	2007-2009	王恒瑞等 2009,郑州黄河湿地大鸨越冬情况及保护对策
61	28	113.947	34.8588	2007-2009	王恒瑞等 2009,郑州黄河湿地大鸨越冬情况及保护对策
62	28	112.952	34.7626	2007-2009	王恒瑞等 2009,郑州黄河湿地大鸨越冬情况及保护对策
63	4	113.783	34.8792	2007-2009	王恒瑞等 2009,郑州黄河湿地大鸨越冬情况及保护对策
64	96	114.19	34.8598	2007-2009，2011	王恒瑞等 2009,郑州黄河湿地大鸨越冬情况及保护对策
65	29	124.44	46.1443	1999-2002	蒋劲松 2003,中国大鸭资源现状及其保护的研究
66	29	124.747	47.1505	1999-2002	蒋劲松 2003,中国大鸭资源现状及其保护的研究
67	9,3	124.672	47.0902	2008-2009	付建国 董义，大庆市大鸨资源监测与保护
68	50	123.081	47.258	1998	李晓民 1999
69	共29	125.526	47.1601	1999-2002	蒋劲松 2003,中国大鸭资源现状及其保护的研究
70	共29	125.622	46.2497	1999-2002	蒋劲松 2003,中国大鸭资源现状及其保护的研究
71	30	114.631	30.2297	1999-2002	蒋劲松 2003,中国大鸭资源现状及其保护的研究
72	8，3	116.097	29.8908	1990+	蒋劲松 2003,中国大鸭资源现状及其保护的研究
73	7	113.062	29.4033	1991	Lei Gang in litt. 1997
74	14	112.819	29.4182	1999-2002	蒋劲松 2003,中国大鸭资源现状及其保护的研究
75	10	122.495	45.8385	1999-2002	蒋劲松 2003,中国大鸭资源现状及其保护的研究
76	1	122.974	42.6366	2013	http://liaoning.nen.com.cn/system/2013/01/09/010193809.shtml
77	70-80，8-10	122.315	45.037	19871999	蒋劲松 2003,中国大鸭资源现状及其保护的研究
78	17，13-14	118.542	33.4034	1998,1999-2002	蒋劲松 2003,中国大鸭资源现状及其保护的研究
79	17，13-14	115.905	29.2503	1993；199，1998，1999-2002	Kennerley 1987；鄱阳湖管理局；I. Lewis in litt. 1999；Yu Yat-tung in litt. 1998；刘伯文，1997，东北地区大鸨的现状和保护，蒋劲松 2003中国大鸨资源现状及其保护的研究
80	17，13-14	116.017	29.1868	1980年代中期，1985，1985-1986，1988，1993；199，1998，1999-2002	Kennerley 1987；鄱阳湖管理局；I. Lewis in litt. 1999；Yu Yat-tung in litt. 1998；刘伯文，1997，东北地区大鸨的现状和保护，蒋劲松 2003中国大鸨资源现状及其保护的研究
81	17，13-14	115.915	29.1846	1980年代中期，1985，1985-1986，1988，1993；199，1998，1999-2002	Kennerley 1987；鄱阳湖管理局；I. Lewis in litt. 1999；Yu Yat-tung in litt. 1998；刘伯文，1997，东北地区大鸨的现状和保护，蒋劲松 2003中国大鸨资源现状及其保护的研究
82	17，13-14	116.594	29.3895	1980年代中期，1985，1985-1986，1988，1993；199，1998，1999-2002	Kennerley 1987；鄱阳湖管理局；I. Lewis in litt. 1999；Yu Yat-tung in litt. 1998；刘伯文，1997，东北地区大鸨的现状和保护，蒋劲松 2003中国大鸨资源现状及其保护的研究
83	17，13-14	115.905	29.2503	1980年代中期，1985，1985-1986，1988，1993；199，1998，1999-2002	Kennerley 1987；鄱阳湖管理局；I. Lewis in litt. 1999；Yu Yat-tung in litt. 1998；刘伯文，1997，东北地区大鸨的现状和保护，蒋劲松 2003中国大鸨资源现状及其保护的研究
84	17，13-14	115.977	29.1823	1980年代中期，1985，1985-1986，1988，1993；199，1998，1999-2002	Kennerley 1987；鄱阳湖管理局；I. Lewis in litt. 1999；Yu Yat-tung in litt. 1998；刘伯文，1997，东北地区大鸨的现状和保护，蒋劲松 2003中国大鸨资源现状及其保护的研究
85	6	120.434	41.811	2012	http://news.liao1.com/newspage/2012/12/4696889.html
86	7，5	108.677	40.7721	1999-2002,2009	蒋劲松 2003中国大鸭资源现状及其保护的研究；http://www.nmrb.cn/Article/200905/20090513091139.html
87	61+	122.926	46.0427	2006	于国海等，2008，大岗附近大鸨越冬种群数量及生态观察（有经纬度）
88	30	111.809	40.7485	1999	Bi Junhuai in litt. 1999；红皮书
89		122.152	43.6072	1999-2002	蒋劲松 2003中国大鸭资源现状及其保护的研究
90	40-50	122.975	46.1931	1999-2002，1998-2004	蒋劲松 2003中国大鸨资源现状及其保护的研究
91	100	115.904	41.9804	1999-2002	蒋劲松 2003中国大鸭资源现状及其保护的研究
92	324，700-800,45，max135(1997),min8(2001)	118.982	37.7565	1994，1995,1999,1997-2006	蒋劲松 2003中国大鸭资源现状及其保护的研究;张希涛 2011，黄河三角洲大鸨越冬状况及保护对策
93	tens	117.145	34.6737	1998-1999	Wang Qishan in litt. 1999；红皮书
94		120.743	37.9242	1990-1996	Fan Qiangdong and Xu Jianmin 1996；红皮书
95	180+	110.472	35.4649	1999-2002，（2003-2013）	蒋劲松 2003中国大鸭资源现状及其保护的研究
96		110.195	34.7631	1999-2002 （2003-2013）	蒋劲松 2003中国大鸭资源现状及其保护的研究
97	25	110.246	35.0977	1999-2002，1995（2003-2013）	蒋劲松 2003中国大鸭资源现状及其保护的研究，Wu Jiayan et al. 1998；红皮书
98	188	109.745	34.605	1999-2002（2003-2013）	蒋劲松 2003中国大鸭资源现状及其保护的研究
99		110.149	34.6569	1999-2002 （2003-2013）	蒋劲松 2003中国大鸭资源现状及其保护的研究
100	240	109.422	34.537	1999-2000（2003-2013）	(Oriental Bird Club Bull. 32 [2000]:
101	21	117.114	39.5854	1998	Zhang Shuping et al. 1999; 红皮书
102	70	117.352	39.8528	2012	http://www.022net.com/2013/1-22/496122322284023.html
