# Supplementary material for: Climate envelope predictions indicate an enlarged suitable wintering distribution for Great Bustards (Otis tarda dybowskii) in China for the 21st century
Source: PeerJ. 2016 Feb 1;4:e1630. doi: 10.7717/peerj.1630 (PMC4741084; doi:10.7717/peerj.1630)
Supplement: Supplemental Information 3 — Supplement S3 Correlation matrix. [file peerj-04-1630-s003.xlsx]

## Sheet: gbcn_corr29
Layer	bio_1	bio_2	bio_3	bio_4	bio_5	bio_6	bio_7	bio_8	bio_9	bio_10	bio_11	bio_12	bio_13	bio_14	bio_15	bio_16	bio_17	bio_18	bio_19	altitue	aspect	slope	landcv	disroad	dirard	disriver	dislake	discsln	dissettle
bio_1	1	-0.62269	-0.09772	-0.33577	0.80853	0.91195	-0.45485	0.84181	0.8901	0.8803	0.91072	0.62365	0.54134	0.61726	-0.52016	0.55643	0.6067	0.518	0.58106	-0.66982	-0.01545	-0.12503	-0.30236	-0.26553	-0.36094	-0.07473	0.24501	-0.36022	-0.49847
bio_2	-0.62269	1	0.29522	0.38409	-0.33015	-0.72539	0.59136	-0.3972	-0.5926	-0.46724	-0.6466	-0.79624	-0.72181	-0.76439	0.56458	-0.73037	-0.75916	-0.69643	-0.72535	0.4258	-0.00299	-0.0951	0.46198	0.38086	0.43813	0.32039	-0.06798	0.51249	0.55563
bio_3	-0.09772	0.29522	1	-0.72969	-0.51611	0.16327	-0.56615	-0.45853	0.25577	-0.47784	0.24058	0.02314	0.02388	-0.15921	0.21494	0.06526	-0.13738	0.08285	-0.10588	0.68394	0.00095	0.38693	0.07458	0.15987	0.35815	-0.08728	0.18589	0.03153	0.25296
bio_4	-0.33577	0.38409	-0.72969	1	0.26865	-0.67255	0.96983	0.194	-0.68365	0.14943	-0.694	-0.51064	-0.42408	-0.38517	0.21268	-0.47371	-0.39981	-0.45426	-0.40642	-0.41971	-0.0006	-0.4164	0.20029	0.06518	-0.1056	0.27643	-0.14407	0.26014	0.08322
bio_5	0.80853	-0.33015	-0.51611	0.26865	1	0.50919	0.14837	0.96973	0.49794	0.984	0.50086	0.25793	0.21084	0.35898	-0.39947	0.19993	0.33974	0.16707	0.31239	-0.90615	-0.01664	-0.39786	-0.12449	-0.18924	-0.36974	0.14836	0.1523	-0.14053	-0.3939
bio_6	0.91195	-0.72539	0.16327	-0.67255	0.50919	1	-0.77558	0.56586	0.97058	0.62156	0.99239	0.73044	0.62264	0.69143	-0.5299	0.65333	0.68937	0.61159	0.66973	-0.35908	-0.00996	0.07707	-0.33679	-0.25197	-0.25351	-0.1855	0.21985	-0.41045	-0.43162
bio_7	-0.45485	0.59136	-0.56615	0.96983	0.14837	-0.77558	1	0.06105	-0.75002	0.00752	-0.77295	-0.65013	-0.5608	-0.53119	0.31588	-0.60407	-0.54294	-0.58021	-0.54043	-0.25202	-0.00075	-0.38037	0.29568	0.15073	0.02011	0.32196	-0.14092	0.36856	0.20704
bio_8	0.84181	-0.3972	-0.45853	0.194	0.96973	0.56586	0.06105	1	0.53524	0.98071	0.55838	0.33288	0.31857	0.35295	-0.34464	0.30216	0.33155	0.29284	0.2987	-0.91264	-0.02068	-0.36304	-0.20389	-0.23027	-0.43515	0.09496	0.20089	-0.24252	-0.46032
bio_9	0.8901	-0.5926	0.25577	-0.68365	0.49794	0.97058	-0.75002	0.53524	1	0.59125	0.9801	0.64358	0.52396	0.63341	-0.50971	0.55972	0.63433	0.51416	0.62731	-0.28983	-0.00968	0.07183	-0.24346	-0.17744	-0.13299	-0.12986	0.20856	-0.32377	-0.32578
bio_10	0.8803	-0.46724	-0.47784	0.14943	0.984	0.62156	0.00752	0.98071	0.59125	1	0.60802	0.39814	0.35511	0.45991	-0.43615	0.34425	0.44183	0.31271	0.41083	-0.91384	-0.01682	-0.34592	-0.21975	-0.24817	-0.43741	0.06486	0.17013	-0.25942	-0.48171
bio_11	0.91072	-0.6466	0.24058	-0.694	0.50086	0.99239	-0.77295	0.55838	0.9801	0.60802	1	0.70041	0.59903	0.64578	-0.48917	0.63131	0.64429	0.59258	0.62753	-0.3283	-0.01177	0.08192	-0.31866	-0.23076	-0.23195	-0.1738	0.24062	-0.39509	-0.41462
bio_12	0.62365	-0.79624	0.02314	-0.51064	0.25793	0.73044	-0.65013	0.33288	0.64358	0.39814	0.70041	1	0.94953	0.84178	-0.4407	0.97083	0.84497	0.93636	0.83014	-0.35728	0.01544	0.19097	-0.5188	-0.35161	-0.44101	-0.36542	0.18029	-0.64104	-0.51926
bio_13	0.54134	-0.72181	0.02388	-0.42408	0.21084	0.62264	-0.5608	0.31857	0.52396	0.35511	0.59903	0.94953	1	0.69507	-0.22607	0.99065	0.69666	0.98118	0.68194	-0.37399	0.00918	0.1683	-0.57842	-0.37692	-0.50652	-0.4133	0.18475	-0.74048	-0.56149
bio_14	0.61726	-0.76439	-0.15921	-0.38517	0.35898	0.69143	-0.53119	0.35295	0.63341	0.45991	0.64578	0.84178	0.69507	1	-0.62045	0.71701	0.99335	0.6364	0.97478	-0.37695	0.01552	0.04096	-0.34862	-0.26411	-0.32068	-0.21442	-0.02465	-0.46947	-0.38493
bio_15	-0.52016	0.56458	0.21494	0.21268	-0.39947	-0.5299	0.31588	-0.34464	-0.50971	-0.43615	-0.48917	-0.4407	-0.22607	-0.62045	1	-0.27767	-0.62533	-0.21904	-0.60648	0.31834	-0.01443	-0.05493	0.10537	0.20415	0.0914	0.02568	-0.09059	-0.1252	0.29273
bio_16	0.55643	-0.73037	0.06526	-0.47371	0.19993	0.65333	-0.60407	0.30216	0.55972	0.34425	0.63131	0.97083	0.99065	0.71701	-0.27767	1	0.71931	0.98541	0.70508	-0.34309	0.01243	0.20201	-0.55876	-0.36492	-0.48036	-0.40378	0.22373	-0.69819	-0.54385
bio_17	0.6067	-0.75916	-0.13738	-0.39981	0.33974	0.68937	-0.54294	0.33155	0.63433	0.44183	0.64429	0.84497	0.69666	0.99335	-0.62533	0.71931	1	0.63769	0.98309	-0.35538	0.01526	0.05218	-0.34147	-0.26172	-0.30756	-0.2239	-0.03933	-0.46998	-0.3776
bio_18	0.518	-0.69643	0.08285	-0.45426	0.16707	0.61159	-0.58021	0.29284	0.51416	0.31271	0.59258	0.93636	0.98118	0.6364	-0.21904	0.98541	0.63769	1	0.61523	-0.32929	0.01007	0.21027	-0.56874	-0.3654	-0.48472	-0.41356	0.25283	-0.69973	-0.54411
bio_19	0.58106	-0.72535	-0.10588	-0.40642	0.31239	0.66973	-0.54043	0.2987	0.62731	0.41083	0.62753	0.83014	0.68194	0.97478	-0.60648	0.70508	0.98309	0.61523	1	-0.32021	0.01625	0.05847	-0.30952	-0.24501	-0.27747	-0.21274	-0.05565	-0.45685	-0.35008
altitue	-0.66982	0.4258	0.68394	-0.41971	-0.90615	-0.35908	-0.25202	-0.91264	-0.28983	-0.91384	-0.3283	-0.35728	-0.37399	-0.37695	0.31834	-0.34309	-0.35538	-0.32929	-0.32021	1	0.00689	0.38903	0.27596	0.29924	0.55846	-0.039	-0.1453	0.29139	0.51198
aspect	-0.01545	-0.00299	0.00095	-0.0006	-0.01664	-0.00996	-0.00075	-0.02068	-0.00968	-0.01682	-0.01177	0.01544	0.00918	0.01552	-0.01443	0.01243	0.01526	0.01007	0.01625	0.00689	1	0.01819	0.00858	0.01896	0.0064	0.02352	0.00738	0.00686	0.01774
slope	-0.12503	-0.0951	0.38693	-0.4164	-0.39786	0.07707	-0.38037	-0.36304	0.07183	-0.34592	0.08192	0.19097	0.1683	0.04096	-0.05493	0.20201	0.05218	0.21027	0.05847	0.38903	0.01819	1	-0.06772	-0.04411	0.09667	-0.18028	0.17914	0.00897	-0.05444
landcv	-0.30236	0.46198	0.07458	0.20029	-0.12449	-0.33679	0.29568	-0.20389	-0.24346	-0.21975	-0.31866	-0.5188	-0.57842	-0.34862	0.10537	-0.55876	-0.34147	-0.56874	-0.30952	0.27596	0.00858	-0.06772	1	0.34418	0.40982	0.41416	-0.08016	0.50311	0.49116
disroad	-0.26553	0.38086	0.15987	0.06518	-0.18924	-0.25197	0.15073	-0.23027	-0.17744	-0.24817	-0.23076	-0.35161	-0.37692	-0.26411	0.20415	-0.36492	-0.26172	-0.3654	-0.24501	0.29924	0.01896	-0.04411	0.34418	1	0.40601	0.21329	-0.07039	0.31348	0.50139
disrard	-0.36094	0.43813	0.35815	-0.1056	-0.36974	-0.25351	0.02011	-0.43515	-0.13299	-0.43741	-0.23195	-0.44101	-0.50652	-0.32068	0.0914	-0.48036	-0.30756	-0.48472	-0.27747	0.55846	0.0064	0.09667	0.40982	0.40601	1	0.06838	-0.09911	0.4552	0.67865
disriver	-0.07473	0.32039	-0.08728	0.27643	0.14836	-0.1855	0.32196	0.09496	-0.12986	0.06486	-0.1738	-0.36542	-0.4133	-0.21442	0.02568	-0.40378	-0.2239	-0.41356	-0.21274	-0.039	0.02352	-0.18028	0.41416	0.21329	0.06838	1	0.14666	0.41422	0.26379
dislake	0.24501	-0.06798	0.18589	-0.14407	0.1523	0.21985	-0.14092	0.20089	0.20856	0.17013	0.24062	0.18029	0.18475	-0.02465	-0.09059	0.22373	-0.03933	0.25283	-0.05565	-0.1453	0.00738	0.17914	-0.08016	-0.07039	-0.09911	0.14666	1	0.03829	-0.14384
discsln	-0.36022	0.51249	0.03153	0.26014	-0.14053	-0.41045	0.36856	-0.24252	-0.32377	-0.25942	-0.39509	-0.64104	-0.74048	-0.46947	-0.1252	-0.69819	-0.46998	-0.69973	-0.45685	0.29139	0.00686	0.00897	0.50311	0.31348	0.4552	0.41422	0.03829	1	0.48443
dissettle	-0.49847	0.55563	0.25296	0.08322	-0.3939	-0.43162	0.20704	-0.46032	-0.32578	-0.48171	-0.41462	-0.51926	-0.56149	-0.38493	0.29273	-0.54385	-0.3776	-0.54411	-0.35008	0.51198	0.01774	-0.05444	0.49116	0.50139	0.67865	0.26379	-0.14384	0.48443	1
