# Supplementary material for: Climate envelope predictions indicate an enlarged suitable wintering distribution for Great Bustards (Otis tarda dybowskii) in China for the 21st century
Source: PeerJ. 2016 Feb 1;4:e1630. doi: 10.7717/peerj.1630 (PMC4741084; doi:10.7717/peerj.1630)
Supplement: Supplemental Information 4 — Supplement S4 Test data. [file peerj-04-1630-s004.xlsx]

## Sheet: gbprepntCN84cln
Num	X	Y
1	119	37.8053
2	112.653	34.8361
3	112.775	34.8156
4	112.8	34.8151
5	117.553	32.9022
6	118.542	33.4034
7	109.422	34.537
8	114.833	37.6272
9	124.44	46.1443
10	125.526	47.1601
11	124.747	47.1505
12	125.622	46.2497
13	114.631	30.2297
14	112.819	29.4182
15	122.495	45.8385
16	108.677	40.7721
17	122.152	43.6072
18	115.904	41.9804
19	110.472	35.4649
20	110.195	34.7631
21	109.745	34.605
22	110.149	34.6569
23	110.246	35.0977
24	122.975	46.1931
25	117.162	32.8859
26	116.637	38.1883
27	117.026	38.4181
28	116.612	37.7978
29	116.351	38.3826
30	117.243	38.1562
31	116.933	38.5159
32	116.65	37.7295
33	116.012	38.2339
34	117.336	38.0778
35	115.955	38.9405
36	117.596	38.1778
37	115.239	36.528
38	115.525	38.2674
39	115.651	37.6476
40	116.552	38.8702
41	115.655	39.2154
42	115.854	38.7345
43	115.502	39.0085
44	119.464	39.8567
45	113.986	38.2698
46	119.238	39.4208
47	118.489	39.2406
48	114.792	37.3921
49	115.64	40.3274
50	114.806	39.9664
51	117.765	41.9207
52	116.974	42.1493
53	117.176	38.4471
54	122.926	46.0427
55	114.079	34.8668
56	113.947	34.8588
57	112.952	34.7626
58	113.783	34.8792
59	114.19	34.8598
60	124.672	47.0902
61	114.366	34.8611
62	114.78	34.922
63	114.308	34.8857
64	114.319	34.9539
65	114.422	34.9383
66	114.178	34.9061
67	111.146	34.7965
68	116.82	38.0965
69	116.984	40.5333
70	120.434	41.811
71	114.304	36.8793
72	117.352	39.8528
73	104.515	35.4214
74	122.974	42.6366
75	114.196	34.9194
76	122.043	39.0691
77	109.276	34.3846
78	114.205	34.8766
79	117.171	38.4462
