# Supplementary material for: Climate envelope predictions indicate an enlarged suitable wintering distribution for Great Bustards (Otis tarda dybowskii) in China for the 21st century
Source: PeerJ. 2016 Feb 1;4:e1630. doi: 10.7717/peerj.1630 (PMC4741084; doi:10.7717/peerj.1630)
Supplement: Supplemental Information 7 [file peerj-04-1630-s007.xls]

## Sheet: statistic_result
current
1	2	4	11	13	14	15	16	19	20	22			Total
43	404	273	63	1949	161	140	13326	2	1442	36			17839
bcm26
1	2	4	5	11	13	14	15	16	19	20	22
3	434	254	1	84	3758	319	155	20133	5	1728	15		26889
bcm45
1	2	4	11	13	14	15	16	18	19	20	22
3	368	140	59	3795	263	113	18148	1	5	1531	8		24434
bcm85
1	2	4	11	13	14	15	16	18	19	20	22
2	395	99	46	3782	167	115	17228	1	3	1602	16		23456
Value	Label
1.	Tree Cover, broadleaved, evergreen LCCS >15% tree cover, tree height >3m
2.	Tree Cover, broadleaved, deciduous, closed
3.	Tree Cover, broadleaved, deciduous, open (open 15-40% tree cover)
4.	Tree Cover, needle-leaved, evergreen
5.	Tree Cover, needle-leaved, deciduous
6.	Tree Cover, mixed leaf type
7.	Tree Cover, regularly flooded, fresh water (& brackish)
8.	Tree Cover, regularly flooded, saline water, (daily variation of water level)
9.	Mosaic: Tree cover / Other natural vegetation
10.	Tree Cover, burnt
11.	Shrub Cover, closed-open, evergreen
12.	Shrub Cover, closed-open, deciduous
13.	Herbaceous Cover, closed-open
14.	Sparse Herbaceous or sparse Shrub Cover
15.	Regularly flooded Shrub and/or Herbaceous Cover
16.	Cultivated and managed areas
17.	Mosaic: Cropland / Tree Cover / Other natural vegetation
18.	Mosaic: Cropland / Shrub or Grass Cover
19.	Bare Areas
20.	Water Bodies (natural & artificial)
21.	Snow and Ice (natural & artificial)
22.	Artificial surfaces and associated areas
